# Supplementary material for: Structural, electronic and catalytic performances of single-atom Fe stabilized by divacancy-nitrogen-doped graphene
Source: Royal Society of Chemistry journal article supplement (doi:10.1039/c6ra28387j), 2017-01-01
Supplement: c6ra28387j1.pdf [file c6ra28387j1.pdf]

### Supporting information

**Fig.S1.** (a)-(c) Top and side views of the final Fe-GN4 structures from the molecular dynamics simulation at 700 K, 1000 K and 1300 K. Black, blue and green balls represent the C, N and Fe atom, respectively.

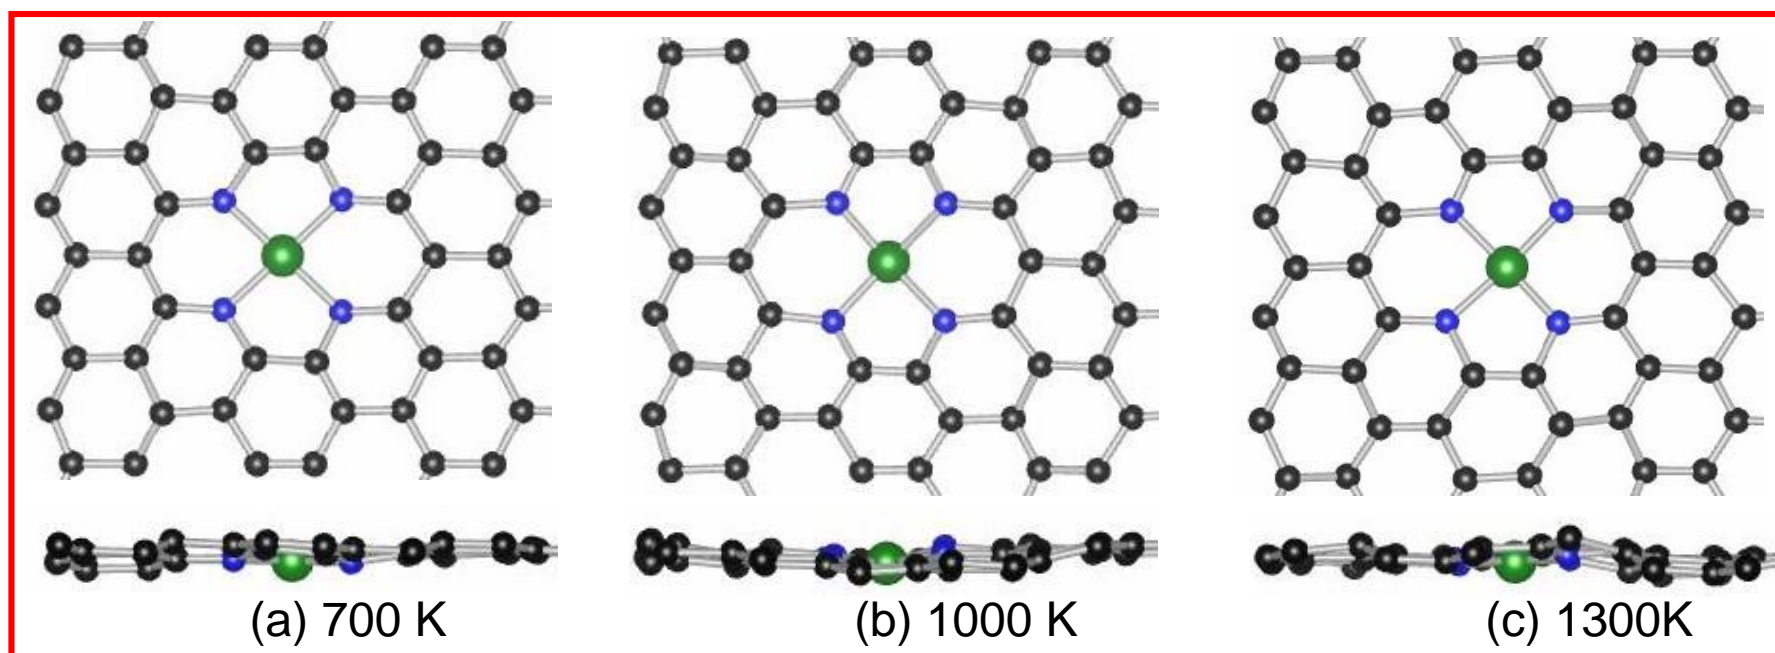

Fig. S1
